# Supplementary material
Source: publisher figshare collection journal article supplement (https://acs.figshare.com/ndownloader/files/4011937)
Supplement: Supplementary file 1 [file 4011937]

# Supporting Information

## Estimation of the acid dissociation constant of perfluoroalkyl carboxylic acids through an experimental investigation of their water-to-air transport

*Vierke, Lena<sup>1,2\*</sup>; Berger, Urs<sup>3</sup>; Cousins, Ian T.<sup>3</sup>*

<sup>1</sup>Federal Environment Agency, Section for Chemicals, Wörlitzer Platz 1, Dessau-Roßlau, Germany; <sup>2</sup>Leuphana University Lüneburg, Institute of Sustainable and Environmental Chemistry, Scharnhorst Str. 1, Lüneburg, Germany; <sup>3</sup>Stockholm University, Department of Applied Environmental Science (ITM), Svante Arrhenius väg 8, Stockholm, Sweden

### Corresponding Author

\*Lena.Vierke@uba.de, Fax. +49 340 2104 6620 Tel. +49 340 2103 6620

|                                                                         |    |
|-------------------------------------------------------------------------|----|
| 1. Names and abbreviations of standards and internal standards .....    | 3  |
| 2. Quality assurance .....                                              | 4  |
| 3. 14-days time series for sorption to top part of vessel at pH 0 ..... | 5  |
| 5. Quantified amounts of target compounds.....                          | 6  |
| 5. 8:2 FTUC(A) as a reference chemical.....                             | 10 |
| 6. Mass balances.....                                                   | 11 |
| 7. Model fit for PFOA .....                                             | 12 |

|                                                                                                                                                                                                                                                                                          |    |
|------------------------------------------------------------------------------------------------------------------------------------------------------------------------------------------------------------------------------------------------------------------------------------------|----|
| <b>Table S 1:</b> Abbreviations and names of analytes including the suppliers and purity for crystalline standards. 8:2 FTUCA was dissolved in methanol.....                                                                                                                             | 3  |
| <b>Table S 2:</b> Names, abbreviations and suppliers of mass-labeled internal standards (IS). .....                                                                                                                                                                                      | 3  |
| <b>Table S 3:</b> Absolute recoveries of IS in different samples compared to the calibration standards. ....                                                                                                                                                                             | 4  |
| <b>Table S 4:</b> Nominal and measured pH over an experimental period of four days.....                                                                                                                                                                                                  | 4  |
| <b>Table S 5:</b> Amounts (in ng) in 1 mL water for duplicates of each setup at t0. ....                                                                                                                                                                                                 | 6  |
| <b>Table S 6:</b> Amounts (in ng) in 1 mL water for duplicates of each setup at t2. ....                                                                                                                                                                                                 | 7  |
| <b>Table S 7:</b> Amounts (in ng) extracted from the top part of the vessels for duplicates of each setup at t2.....                                                                                                                                                                     | 8  |
| <b>Table S 8:</b> Amounts (in ng) extracted from the bottom part of the vessels for duplicates of each setup at t2. ....                                                                                                                                                                 | 9  |
| <br><b>Figure S 1:</b> Fraction (in % of amount in the standard used for spiking) sorbed to the top part of the vessel at certain time points at pH 0. ....                                                                                                                              | 5  |
| <b>Figure S 2:</b> Percentage of 8:2 FTUC(A) (semi-quantitative) and PFC(A)s of the total amount in the system at t0 found in the water at t2 in dependence of the pH in the water phase.....                                                                                            | 10 |
| <b>Figure S 3:</b> Percentages of the total amount in the systems at t0 found in the water and sorbed to the top and bottom parts of the vessel for selected pHs after two days (t2). ....                                                                                               | 11 |
| <b>Figure S 4:</b> Least square fit of modeled results to measured data for PFOA. Calculated loss from water after two days (dashed line, in %) and measured fraction sorbed to the top part after two days (dots, in % of amount found at t0) plotted against the pH of the water. .... | 12 |

## 1. Names and abbreviations of standards and internal standards

**Table S 1:** Abbreviations and names of analytes including the suppliers and purity for crystalline standards. 8:2 FTUCA was dissolved in methanol.

| Abbreviation | Name                          | Supplier                   | Purity  |
|--------------|-------------------------------|----------------------------|---------|
| PFBA         | Perfluorobutanoic acid        | Aldrich                    | 99 %    |
| PFHxA        | Perfluorohexanoic acid        | ABCR                       | 98 %    |
| PFHpA        | Perfluoroheptanoic acid       | Aldrich                    | 99 %    |
| PFOA         | Perfluorooctanoic acid        | ABCR                       | 98 %    |
| PFNA         | Perfluorononanoic acid        | Aldrich                    | 97 %    |
| PFDA         | Perfluorodecanoic acid        | Fluka                      | ≥ 97 %  |
| PFUnDA       | Perfluoroundecanoic acid      | Aldrich                    | 95 %    |
| PFDoDA       | Perfluorododecanoic acid      | Aldrich                    | 95 %    |
| PFBS         | Perfluorobutane sulfonic acid | Dyneon (potassium salt)    | unknown |
| PFHxS        | Perfluorohexane sulfonic acid | Interchim (potassium salt) | 98 %    |
| PFOS         | Perfluorooctane sulfonic acid | Fluka (potassium salt)     | ≥ 98 %  |
| 8:2 FTUCA    | 2H-Perfluorodecanoic acid     | Wellington Laboratories    | unknown |

**Table S 2:** Names, abbreviations and suppliers of mass-labeled internal standards (IS).

| Abbreviation        | Name                                                                     | Supplier                            |
|---------------------|--------------------------------------------------------------------------|-------------------------------------|
| MPFHxS <sup>1</sup> | Perfluoro-1-hexane-[ <sup>18</sup> O <sub>2</sub> ]sulfonic acid         | Wellington Laboratories (MPFAC-MXA) |
| MPFOS               | Perfluoro-1-[1,2,3,4- <sup>13</sup> C <sub>4</sub> ]octane sulfonic acid |                                     |
| MPFBA               | Perfluoro-n-[1,2,3,4- <sup>13</sup> C <sub>4</sub> ]butanoic acid        |                                     |
| MPFHxA              | Perfluoro-n-[1,2,- <sup>13</sup> C <sub>2</sub> ]hexanoic acid           |                                     |
| MPFOA               | Perfluoro-n-[1,2,3,4- <sup>13</sup> C <sub>4</sub> ]octanoic acid        |                                     |
| MPFNA               | Perfluoro-n-[1,2,3,4,5- <sup>13</sup> C <sub>5</sub> ]nonanoic acid      |                                     |
| MPFDA               | Perfluoro-n-[1,2- <sup>13</sup> C <sub>2</sub> ]decanoic acid            |                                     |
| MPFUnDA             | Perfluoro-n-[1,2- <sup>13</sup> C <sub>2</sub> ]undecanoic acid          |                                     |
| MPFDoDA             | Perfluoro-n-[1,2- <sup>13</sup> C <sub>2</sub> ]dodecanoic acid          |                                     |
| MPFHpA              | Perfluoro-n-[1,2,3,4- <sup>13</sup> C <sub>4</sub> ]heptanoic acid       | Wellington Laboratories             |
| M8:2 FTUCA          | 2H-Perfluorooctyl-[1,2- <sup>13</sup> C <sub>2</sub> ]-decanoic acid     | Wellington Laboratories             |

<sup>1</sup> MPFHxS has also been used as IS for PFBS.

## 2. Quality assurance

**Table S 3:** Absolute recoveries of IS in different samples compared to the calibration standards (averages  $\pm$  standard deviation, in %,  $n = 35$ ).

| Name      | Water        | Top          | Bottom       |
|-----------|--------------|--------------|--------------|
| PFBA      | $184 \pm 42$ | $122 \pm 26$ | $125 \pm 26$ |
| PFHxA     | $128 \pm 27$ | $124 \pm 45$ | $127 \pm 36$ |
| PFHpA     | $132 \pm 25$ | $128 \pm 30$ | $129 \pm 30$ |
| PFOA      | $123 \pm 27$ | $126 \pm 34$ | $124 \pm 35$ |
| PFNA      | $137 \pm 25$ | $135 \pm 30$ | $133 \pm 29$ |
| PFDA      | $116 \pm 21$ | $116 \pm 24$ | $113 \pm 25$ |
| PFUnDA    | $133 \pm 32$ | $124 \pm 35$ | $111 \pm 36$ |
| PFDoDA    | $182 \pm 53$ | $158 \pm 46$ | $143 \pm 50$ |
| PFHxS     | $117 \pm 13$ | $115 \pm 13$ | $101 \pm 17$ |
| PFOS      | $117 \pm 19$ | $111 \pm 20$ | $95 \pm 22$  |
| 8:2 FTUCA | $51 \pm 90$  | not analyzed | not analyzed |

**Table S 4:** Nominal and measured pH over an experimental period of four days.

| Nominal | Measured<br>( $\pm$ standard dev.; $n = 6$ ) |
|---------|----------------------------------------------|
| 0       | $0.32 \pm 0.01$                              |
| 0.5     | $0.73 \pm 0.01$                              |
| 1.5     | $1.59 \pm 0.01$                              |
| 2.5     | $2.57 \pm 0.01$                              |
| 3       | $3.07 \pm 0.01$                              |
| 3.5     | $3.64 \pm 0.01$                              |
| 4.5     | $4.99 \pm 0.04$                              |
| neutral | $6.90 \pm 0.05$                              |

### 3. 14-days time series for sorption to top part of vessel at pH 0

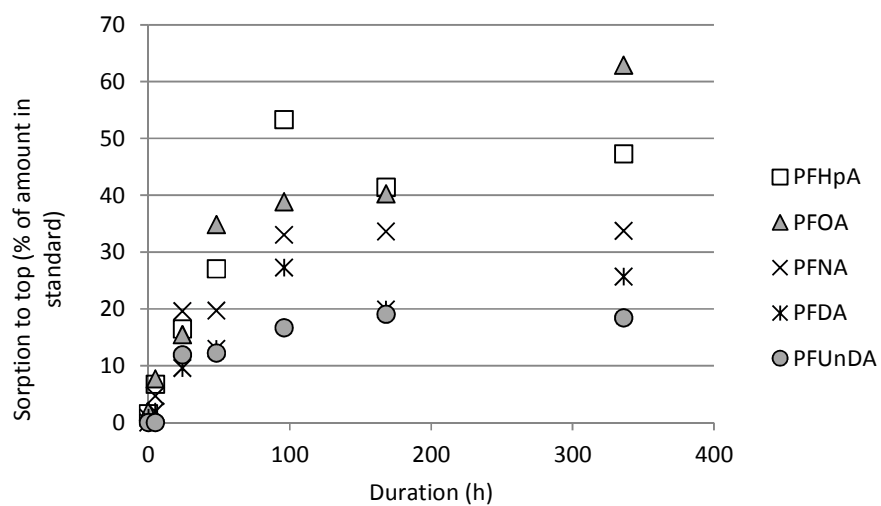

**Figure S 1:** Fraction (in % of amount in the standard used for spiking) sorbed to the top part of the vessel at certain time points at pH 0 (semi-quantitative, analytical method not fully optimized).

1 **5. Quantified amounts of target compounds**

2 **Table S 5:** Amounts (in ng) in 1 mL water for duplicates of each setup at t0 (to be multiplied with a factor 20 to calculate the whole amount in the  
3 water of the system).

| Nominal pH | Blank | neutral |      | 4.5  |      | 3.5  |      | 3    |      | 2.5  |      | 1.5  |      | 0.5  |      | 0    |      |
|------------|-------|---------|------|------|------|------|------|------|------|------|------|------|------|------|------|------|------|
| PFBA       | n.d.  | 1.1     | 1.1  | 1.0  | 0.98 | 1.7  | 1.3  | 0.9  | 1.1  | 0.97 | 0.88 | 1.1  | 1.4  | 1.4  | 0.97 | 2.1  | 1.0  |
| PFHxA      | n.d.  | 1.9     | 2.4  | 1.6  | 1.7  | 1.6  | 1.5  | 1.6  | 1.7  | 1.5  | 1.6  | 1.6  | 1.6  | 1.8  | 1.8  | 7.0  | 1.7  |
| PFHpA      | n.d.  | 0.82    | 0.87 | 0.89 | 0.85 | 0.96 | 0.93 | 0.82 | 0.89 | 0.89 | 0.90 | 0.93 | 0.91 | 0.83 | 0.9  | 0.91 | 0.85 |
| PFOA       | n.d.  | 1.1     | 0.99 | 1.3  | 1.2  | 1.1  | 0.99 | 1.1  | 1.1  | 1.2  | 1.1  | 1.3  | 1.1  | 1.1  | 1.3  | 1.3  | 1.0  |
| PFNA       | n.d.  | 1.0     | 0.96 | 0.93 | 0.96 | 1.1  | 0.9  | 1.0  | 0.91 | 1.2  | 1.0  | 1.1  | 1.1  | 1.1  | 1.1  | 0.86 | 1.0  |
| PFDA       | n.d.  | 1.0     | 0.94 | 0.98 | 1.1  | 0.92 | 0.95 | 0.83 | 1.1  | 1.1  | 1.0  | 1.0  | 0.94 | 1.2  | 0.96 | 0.94 | 0.98 |
| PFUnDA     | n.d.  | 0.24    | 0.41 | 0.19 | 0.3  | 0.28 | 0.21 | 0.27 | 0.18 | 0.29 | 0.20 | 0.22 | 0.22 | 0.24 | 0.36 | 0.24 | 0.3  |
| PFDODA     | n.d.  | 0.06    | 0.07 | 0.09 | 0.06 | 0.14 | 0.11 | 0.06 | 0.05 | 0.07 | 0.09 | 0.09 | 0.08 | 0.03 | 0.06 | 0.06 | 0.06 |
| PFTeDA     | n.d.  | 0.35    | 0.31 | 0.19 | 0.22 | 0.68 | 0.24 | 0.33 | 0.34 | 0.14 | 0.45 | 0.33 | 0.19 | n.d. | n.d. | n.d. | n.d. |
| PFBS       | n.d.  | 0.96    | 1.2  | 1.1  | 1.1  | 1.2  | 1.1  | 1.0  | 1.2  | 1.2  | 1.1  | 1.1  | 1.2  | 1.1  | 1.2  | 1.2  | 1.3  |
| PFHxS      | n.d.  | 0.98    | 1.1  | 1.0  | 1.1  | 1.1  | 1.1  | 1.0  | 1.2  | 1.1  | 1.0  | 0.94 | 1.1  | 0.86 | 1.0  | 1.0  | 1.1  |
| PFOS       | n.d.  | 0.84    | 0.89 | 0.86 | 0.98 | 0.76 | 0.94 | 0.77 | 1.1  | 0.75 | 1.0  | 0.56 | 0.74 | 0.91 | 0.92 | 0.9  | 0.93 |
| 8:2 FTUCA  | n.d.  | 1.9     | 1.9  | 2.7  | 2.9  | 2.1  | 1.7  | 1.7  | 2.1  | 1.7  | 1.9  | 2.2  | 1.8  | 2.2  | 1.8  | 2.3  | 2.1  |

6 **Table S 6:** Amounts (in ng) in 1 mL water for duplicates of each setup at t2 (to be multiplied with a factor 20 to calculate the whole amount in the  
7 water of the system).

| Nominal pH | Blank |      | neutral |      | 4.5  |      | 3.5  |      | 3    |      | 2.5  |      | 1.5  |      | 0.5  |      | 0    |      |
|------------|-------|------|---------|------|------|------|------|------|------|------|------|------|------|------|------|------|------|------|
| PFBA       | n.d.  | n.d. | 0.97    | 1.1  | 1.3  | 1.4  | 1.5  | 1.1  | 1.0  | 0.93 | 1.1  | 1.0  | 1.5  | 2.0  | 1.1  | 1.2  | 1.1  | 1.4  |
| PFHxA      | n.d.  | n.d. | 1.8     | 1.8  | 1.7  | 1.7  | 1.7  | 1.8  | 1.8  | 1.8  | 1.7  | 1.5  | 1.7  | 1.8  | 1.7  | 1.5  | 1.0  | 1.1  |
| PFHpA      | n.d.  | n.d. | 0.83    | 0.88 | 0.83 | 0.92 | 0.89 | 0.9  | 0.82 | 0.83 | 0.86 | 0.88 | 0.77 | 0.92 | 0.68 | 0.61 | 0.33 | 0.31 |
| PFOA       | n.d.  | n.d. | 1.1     | 0.97 | 1.1  | 1.4  | 1.1  | 1.1  | 1.0  | 0.96 | 0.99 | 0.96 | 0.95 | 0.9  | 0.49 | 0.50 | 0.32 | 0.34 |
| PFNA       | n.d.  | n.d. | 0.9     | 0.9  | 0.96 | 0.95 | 0.91 | 0.91 | 0.86 | 0.93 | 1.0  | 0.93 | 0.6  | 0.71 | 0.35 | 0.38 | 0.31 | 0.31 |
| PFDA       | n.d.  | n.d. | 0.44    | 0.91 | 0.76 | 0.85 | 1.1  | 1.2  | 1.0  | 0.75 | 0.67 | 0.5  | 0.36 | n.d. | 0.35 | 0.31 | 0.35 | 0.24 |
| PFUnDA     | n.d.  | n.d. | 0.26    | 0.31 | 0.19 | 0.3  | 0.27 | 0.27 | 0.28 | 0.24 | 0.16 | 0.25 | 0.20 | 0.26 | 0.12 | 0.14 | <MQL | 0.12 |
| PFDoDA     | n.d.  | n.d. | <MQL    | <MQL | <MQL | <MQL | <MQL | <MQL | <MQL | <MQL | <MQL | <MQL | <MQL | <MQL | <MQL | <MQL | <MQL | <MQL |
| PFTeDA     | n.d.  | n.d. | 0.22    | 0.27 | 1.2  | 0.24 | 0.2  | 0.39 | 0.26 | 0.24 | 0.56 | 0.30 | <MQL | 0.58 | n.d. | n.d. | n.d. | n.d. |
| PFBS       | n.d.  | n.d. | 1.2     | 1.2  | 1.4  | 1.3  | 1.3  | 1.2  | 1.1  | 1.2  | 1.4  | 0.93 | 1.1  | 1.3  | 1.0  | 1.1  | 1.2  | 1.2  |
| PFHxS      | n.d.  | n.d. | 1.1     | 1.1  | 1.3  | 1.2  | 1.1  | 1.0  | 0.95 | 1.1  | 1.2  | 0.92 | 1.1  | 1.1  | 0.88 | 0.97 | 1.0  | 1.0  |
| PFOS       | n.d.  | n.d. | 1.1     | 1.1  | 1.5  | 1.1  | 0.96 | 1.2  | 1.5  | 0.91 | 1.0  | 0.93 | 0.72 | 1.2  | 0.99 | 1.0  | 1.3  | 0.98 |
| 8:2 FTUCA  | n.d.  | n.d. | 2.0     | 2.2  | 2.1  | 1.9  | 0.52 | 0.59 | 0.26 | 0.14 | 0.23 | 0.19 | 0.28 | 0.19 | 0.38 | 0.61 | 0.14 | 0.07 |

8

9 **Table S 7: Amounts (in ng) extracted from the top part of the vessels for duplicates of each setup at t2.**

| Nominal pH | Blank |      | neutral |      | 4.5  |      | 3.5  |      | 3    |      | 2.5  |      | 1.5  |      | 0.5  |      | 0    |      |
|------------|-------|------|---------|------|------|------|------|------|------|------|------|------|------|------|------|------|------|------|
| PFBA       | n.d.  | n.d. | n.d.    | n.d. | n.d. | n.d. | n.d. | <MQL | n.d. | n.d. | n.d. | n.d. | n.d. | n.d. | <MQL | <MQL | 0.7  | 1.2  |
| PFHxA      | <MQL  | <MQL | <MQL    | n.d. | n.d. | <MQL | <MQL | n.d. | <MQL | <MQL | 0.17 | <MQL | 0.28 | 0.42 | 2.3  | 2.2  | 6.8  | 7.0  |
| PFHpA      | n.d.  | n.d. | n.d.    | n.d. | n.d. | n.d. | n.d. | n.d. | <MQL | <MQL | <MQL | <MQL | 0.38 | 0.42 | 2.5  | 2.5  | 5.6  | 5.9  |
| PFOA       | n.d.  | n.d. | n.d.    | n.d. | n.d. | n.d. | <MQL | <MQL | <MQL | <MQL | 0.20 | 0.19 | 1.1  | 1.3  | 4.9  | 5.0  | 6.4  | 7.7  |
| PFNA       | n.d.  | n.d. | n.d.    | n.d. | n.d. | n.d. | <MQL | <MQL | 0.1  | <MQL | 0.33 | 0.33 | 1.5  | 1.6  | 4.0  | 5.3  | 4.6  | 6.2  |
| PFDA       | n.d.  | n.d. | n.d.    | n.d. | <MQL | n.d. | <MQL | <MQL | 0.1  | 0.1  | 0.3  | 0.29 | 1.2  | 1.5  | 2.7  | 5.1  | 3.6  | 3.3  |
| PFUnDA     | n.d.  | n.d. | n.d.    | n.d. | <MQL | n.d. | n.d. | <MQL | <MQL | <MQL | <MQL | <MQL | 0.17 | 0.29 | 0.52 | 0.64 | 0.77 | 0.73 |
| PFDoDA     | n.d.  | n.d. | n.d.    | n.d. | n.d. | n.d. | n.d. | n.d. | n.d. | n.d. | <MQL |
| PFTeDA     | <MQL  | n.d. | n.d.    | n.d. | n.d. | n.d. | n.d. | n.d. | n.d. | n.d. | n.d. | n.d. | n.d. | n.d. | n.d. | n.d. | n.d. | n.d. |
| PFBS       | <MQL  | n.d. | n.d.    | n.d. | n.d. | n.d. | n.d. | n.d. | n.d. | n.d. | n.d. | n.d. | n.d. | n.d. | n.d. | <MQL | n.d. | n.d. |
| PFHxS      | <MQL  | n.d. | n.d.    | n.d. | n.d. | n.d. | <MQL | n.d. | n.d. | n.d. | n.d. | n.d. | <MQL | n.d. | n.d. | <MQL | n.d. | <MQL |
| PFOS       | n.d.  | n.d. | n.d.    | n.d. | <MQL | n.d. | n.d. | n.d. | n.d. | n.d. | <MQL | n.d. |



11 **Table S 8:** Amounts (in ng) extracted from the bottom part of the vessels for duplicates of each setup at t2.

| Nominal pH | Blank |      | neutral |      | 4.5  |      | 3.5  |      | 3    |      | 2.5  |      | 1.5  |      | 0.5  |      | 0    |      |
|------------|-------|------|---------|------|------|------|------|------|------|------|------|------|------|------|------|------|------|------|
| PFBA       | n.d.  | n.d. | n.d.    | n.d. | n.d. | n.d. | n.d. | <MQL | n.d. | n.d. | n.d. | n.d. | n.d. | n.d. | <MQL | <MQL | <MQL | <MQL |
| PFHxA      | <MQL  | <MQL | n.d.    | n.d. | <MQL | <MQL | <MQL | 0.4  | n.d. | <MQL | <MQL | <MQL | 0.31 | <MQL | 0.89 | 0.82 | 0.84 | 1.0  |
| PFHpA      | n.d.  | n.d. | n.d.    | n.d. | <MQL | <MQL | n.d. | 0.17 | n.d. | <MQL | <MQL | <MQL | 0.17 | <MQL | 0.64 | 0.84 | 0.68 | 0.75 |
| PFOA       | n.d.  | n.d. | n.d.    | n.d. | <MQL | <MQL | <MQL | 0.23 | <MQL | <MQL | 0.15 | 0.12 | 0.48 | 0.17 | 1.5  | 1.8  | 1.2  | 0.91 |
| PFNA       | n.d.  | n.d. | <MQL    | <MQL | <MQL | <MQL | <MQL | 0.29 | 0.13 | 0.23 | 0.30 | 0.3  | 0.86 | 0.32 | 2.0  | 2.2  | 1.5  | 1.1  |
| PFDA       | n.d.  | n.d. | 0.16    | 0.25 | 0.26 | 0.14 | 0.33 | 0.38 | 0.21 | 0.53 | 0.54 | 0.53 | 1.4  | 0.61 | 2.3  | 2.4  | 1.6  | 1.4  |
| PFUnDA     | n.d.  | n.d. | 0.23    | 0.33 | 0.16 | <MQL | 0.17 | 0.17 | 0.12 | 0.16 | 0.32 | 0.18 | 0.59 | 0.32 | 0.84 | 1.2  | 0.88 | 1.4  |
| PFDoDA     | n.d.  | n.d. | <MQL    | <MQL | <MQL | n.d. | <MQL | <MQL | <MQL | <MQL | <MQL | <MQL | 0.12 | 0.1  | 0.33 | 0.27 | 0.25 | 0.21 |
| PFTeDA     | n.d.  | n.d. | 0.11    | <MQL | 0.27 | n.d. | <MQL | n.d. | 0.1  | 0.24 | 0.19 | 0.12 | <MQL | 0.18 | n.d. | n.d. | 0.23 | 0.19 |
| PFBS       | n.d.  | n.d. | n.d.    | n.d. | <MQL | <MQL | n.d. | 0.2  | n.d. | <MQL | <MQL | n.d. | <MQL | <MQL | 0.23 | 0.13 | <MQL | <MQL |
| PFHxS      | n.d.  | n.d. | n.d.    | n.d. | <MQL | <MQL | <MQL | 0.21 | <MQL | <MQL | <MQL | <MQL | <MQL | <MQL | 0.46 | 0.29 | 0.2  | 0.15 |
| PFOS       | n.d.  | n.d. | 0.1     | 0.1  | 0.23 | <MQL | 0.20 | 0.35 | <MQL | 0.30 | 0.26 | 0.14 | 0.58 | 0.33 | 3.3  | 2.5  | 1.9  | 1.3  |

12

## 5. 8:2 FTUC(A) as a reference chemical

Figure 4 shows the fraction of the total amount found in the vessels at  $t_0$  that was found in water at  $t_2$  for 8:2 FTUC(A) compared to PFC(A)s. The loss of 8:2 FTUC(A) from water compared to the loss of PFC(A)s from water shows that 8:2 FTUC(A) is already lost from water at higher pHs (3.5 - 5) and that the loss is leveling off at lower pHs (<3). It can be concluded that the system is showing different results for chemicals with different  $pK_a$ 's indicating that the results are influenced by the  $pK_a$ .

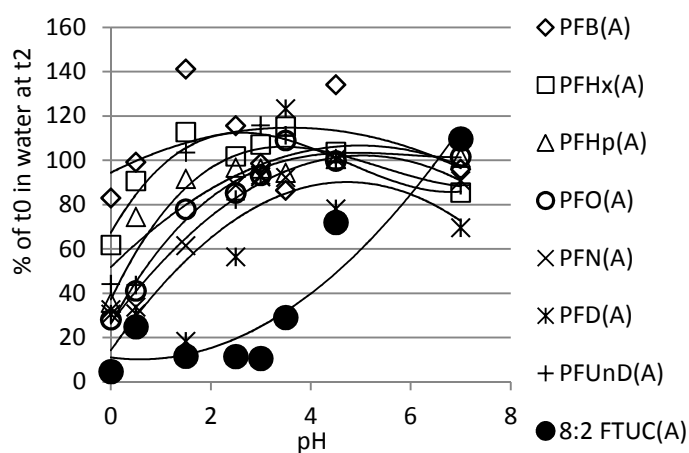

**Figure S 2:** Percentage of 8:2 FTUC(A) (semi-quantitative) and PFC(A)s remaining at  $t_2$  (relative to the total amount in the system at  $t_0$ ) plotted as a function of the water pH. Lines represent a polynomial fit for the data point of each analyte.

## 6. Mass balances

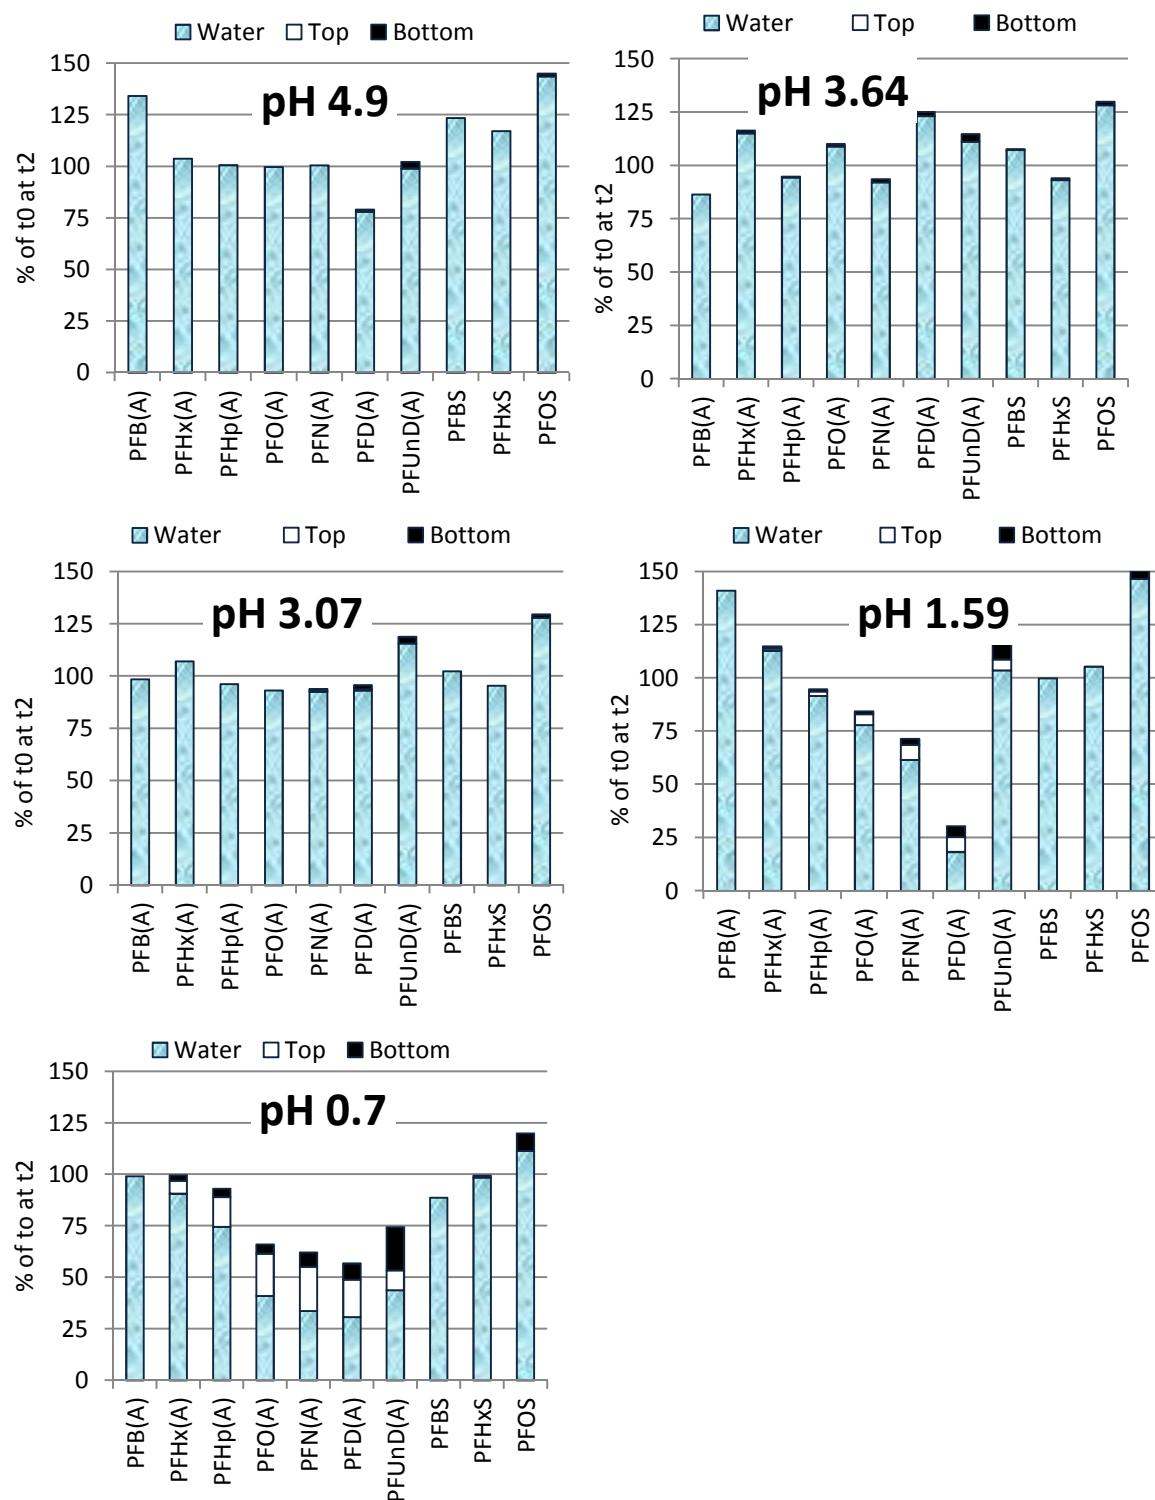

**Figure S 3:** Percentages of the total amount remaining in the systems at t2 (found in the water and sorbed to the top and bottom parts of the vessel) relative to the amount at t0 for selected water pHs.

## 7. Model fit for PFOA

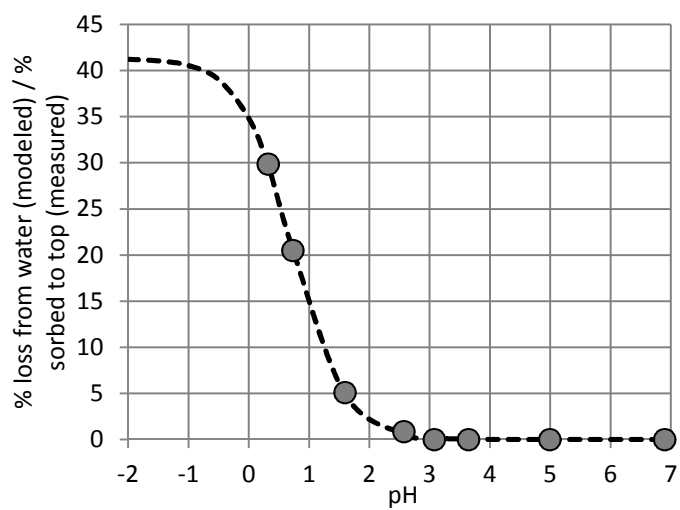

**Figure S 4:** Least square fit of modeled results to measured data for PFOA. Calculated loss from water after two days (dashed line, in %) and measured fraction sorbed to the top part after two days (dots, in % of amount found at t<sub>0</sub>) plotted against the pH of the water.
